# Supplementary material for: Chitosan/Cyclodextrin/TPP Nanoparticles Loaded with Quercetin as Novel Bacterial Quorum Sensing Inhibitors
Source: PubMed Central journal article supplement (PMC6150374; doi:10.3390/molecules22111975), 2017-11-15
Supplement: molecules-22-01975-s001.pdf [file molecules-22-01975-s001.pdf]

1 *Supplementary Information*

2 **Chitosan/Cyclodextrin/TPP nanoparticles loaded**  
 3 **with quercetin as novel bacterial quorum sensing**  
 4 **inhibitors**

5 **Hao Thanh Nguyen<sup>1,3</sup>, Francisco M. Goycoolea<sup>1,2,\*</sup>**

6 <sup>1</sup> Institute for Biology and Biotechnology of Plants, University of Münster, Münster 48143, Germany;  
 7 t\_nguy32@uni-muenster.de

8 <sup>2</sup> School of Food Science and Nutrition, University of Leeds, LS2 9JT United Kingdom;  
 9 F.M.Goycoolea@leeds.ac.uk

10 <sup>3</sup> Faculty of Biotechnology, Vietnam National University of Agriculture, Vietnam; nthao.cnsh@vnua.edu.vn

11 \*Correspondence: F.M.Goycoolea@leeds.ac.uk; Tel.: +44(0)-113-343-1412

12 **Table S1.** Physicochemical properties of unexpected CS<sub>70/5</sub> NPs. (mean ± S.D., *n* = 3)

| Mass ratio<br>CS/CD/TPP<br>(w/w/w) | Charge ratio (+/-<br>) | Size (nm)             | PDI | ζ potential<br>(mV) | Production yield<br>(%) |
|------------------------------------|------------------------|-----------------------|-----|---------------------|-------------------------|
| 4/1/0                              | 5.20                   | a                     | -   | -                   | -                       |
| 4/2/0                              | 2.60                   | a                     | -   | -                   | -                       |
| 4/3/0                              | 1.73                   | b                     | -   | -                   | -                       |
| 4/4/0                              | 1.30                   | b                     | -   | -                   | -                       |
| 4/5/0                              | 1.04                   | b                     | -   | -                   | -                       |
| 4/6/0                              | 0.87                   | b                     | -   | -                   | -                       |
| 4/1.5/1                            | 1.22                   | b                     | -   | -                   | -                       |
| 4/2/0.75                           | 1.27                   | b                     | -   | -                   | -                       |
| 4/3/0.5                            | 1.19                   | b                     | -   | -                   | -                       |
| 4/4/0.25                           | 1.11                   | b                     | -   | -                   | -                       |
| 4/0/1                              | 1.88                   | Non-<br>resuspendable | -   | -                   | -                       |

13 PDI: Polydispersity index; <sup>a</sup> A clear solution was obtained; <sup>b</sup> Precipitation or gel-formation was  
 14 observed.

15 **Table S2.** Physicochemical properties of unexpected CS<sub>70/20</sub> NPs (mean ± S.D., *n* = 3)

| Mass ratio<br>CS/CD/TPP<br>(w/w/w) | Charge ratio<br>(+/-) | Size (nm)             | PDI | ζ potential<br>(mV) | Production<br>yield (%) |
|------------------------------------|-----------------------|-----------------------|-----|---------------------|-------------------------|
| 4/1/0                              | 6.25                  | a                     | -   | -                   | -                       |
| 4/2/0                              | 3.12                  | a                     | -   | -                   | -                       |
| 4/5/0                              | 1.25                  | b                     | -   | -                   | -                       |
| 4/1.5/1                            | 1.46                  | b                     | -   | -                   | -                       |
| 4/2/0.75                           | 1.53                  | b                     | -   | -                   | -                       |
| 4/3/0.5                            | 1.42                  | b                     | -   | -                   | -                       |
| 4/4/0.25                           | 1.33                  | b                     | -   | -                   | -                       |
| 4/0/1.25                           | 1.80                  | b                     | -   | -                   | -                       |
| 4/0/1.5                            | 1.50                  | b                     | -   | -                   | -                       |
| 4/0/2                              | 1.13                  | b                     | -   | -                   | -                       |
| 4/1/1                              | 1.66                  | b                     | -   | -                   | -                       |
| 4/1/0.5                            | 2.62                  | a                     | -   | -                   | -                       |
| 4/2/0.25                           | 2.32                  | Non-<br>resuspendable | -   | -                   | -                       |

16 PDI: Polydispersity index; <sup>a</sup> A clear solution was obtained; <sup>b</sup> Precipitation or gel-formation was  
17 observed.

18 **Table S3.** The effect of Captisol® concentration on the solubility of quercetin, encapsulation efficiency  
19 (EE) and the final loading of quercetin into CS<sub>70/5</sub> nanoparticles (mean ± SD, *n* =3). Control values:  
20 4/0/0.75 NPs

| Mass ratio<br>CS/CD/TPP<br>(w/w/w) | Charge ratio<br>(+/-) | Captisol®<br>conc.<br>(mg/mL) | Quer. Solubility<br>conc. (mg/mL) | Association<br>efficiency (%) | Loading<br>efficiency (%) |
|------------------------------------|-----------------------|-------------------------------|-----------------------------------|-------------------------------|---------------------------|
| 4/0/0.75                           | 2.5                   | 0                             | 0.0095 ± 0.0004                   | 95.38 ± 0.67                  | 0.50 ± 0.0335             |
| 4/0/0.5                            | 3.75                  | 0                             | 0.0095 ± 0.0004                   | 96.80 ± 0.76                  | 0.55 ± 0.0236             |
| 4/1/0.5                            | 2.18                  | 0.375                         | 0.0219 ± 0.0013                   | 93.20 ± 1.36                  | 0.98 ± 0.0624             |
| 4/2/0.25                           | 1.93                  | 0.75                          | 0.0394 ± 0.0009                   | 90.45 ± 1.30                  | 1.49 ± 0.0252             |

21 **Table S4.** The effect of Captisol® concentration on the solubility of quercetin, encapsulation efficiency  
22 (EE) and the final loading of quercetin into CS<sub>70/20</sub> nanoparticles (mean ± SD, *n* =3). Control values:  
23 4/0/1 NPs

| Mass ratio<br>CS/CD/TPP<br>(w/w/w) | Charge ratio<br>(+/-) | Captisol®<br>conc.<br>(mg/mL) | Quer. Solubility<br>conc. (mg/mL) | Association<br>efficiency (%) | Loading<br>efficiency (%) |
|------------------------------------|-----------------------|-------------------------------|-----------------------------------|-------------------------------|---------------------------|
| 4/0/1                              | 2.25                  | 0                             | 0.0083 ± 0.0004                   | 67.29 ± 3.90                  | 0.30 ± 0.0159             |
| 4/0/0.75                           | 3                     | 0                             | 0.0083 ± 0.0004                   | 71.43 ± 2.43                  | 0.33 ± 0.0112             |
| 4/3/0                              | 2.08                  | 1.125                         | 0.0646 ± 0.0051                   | 91.82 ± 2.07                  | 2.20 ± 0.1078             |
| 4/4/0                              | 1.56                  | 1.5                           | 0.0787 ± 0.0018                   | 94.69 ± 0.33                  | 2.43 ± 0.0084             |
| 4/1/0.75                           | 2.03                  | 0.375                         | 0.0219 ± 0.0013                   | 85.42 ± 2.28                  | 0.86 ± 0.0230             |
| 4/2/0.5                            | 1.85                  | 0.75                          | 0.0394 ± 0.0009                   | 85.17 ± 3.25                  | 1.35 ± 0.0404             |

24 **Table S5.** Influences of different formulations on the reduction of bacterial growth (OD<sub>600</sub>) and  
25 relative QS activities as compared to the positive control

| Free components         | Captiso<br>10.1875<br>mg/mL | Captiso<br>10.375<br>mg/mL | Captiso<br>10.75<br>mg/mL | CS <sub>70/5</sub><br>0.75<br>mg/mL | CS <sub>70/20</sub><br>0.75<br>mg/mL | Querceti<br>n 0.0125<br>mg/mL | Quercetin<br>0.025<br>mg/mL                       | Quercetin<br>0.0375<br>mg/mL |
|-------------------------|-----------------------------|----------------------------|---------------------------|-------------------------------------|--------------------------------------|-------------------------------|---------------------------------------------------|------------------------------|
| OD reduction            | -2.09%                      | 0.48%                      | 1.18%                     | 21.08<br>%                          | 88.67<br>%                           | 25.38%                        | 29.06%                                            | 33.34%                       |
| QS reduction            | 8.43%                       | 17.53%                     | 20.86%                    | 27.08<br>%                          | 65.79<br>%                           | -54.95%                       | -35.57%                                           | -20.97%                      |
| CS <sub>70/20</sub> NPs | U 4/0/1                     | U 4/2/0.5                  | U 4/3/0                   | U 4/4/0                             | L 4/0/1                              | L 4/2/0.5                     | L 4/3/0                                           | L 4/4/0                      |
| OD reduction            | 30.10%                      | 71.33%                     | 44.64%                    | 63.34<br>%                          | 39.48<br>%                           | 81.96%                        | 60.03%                                            | 88.32%                       |
| QS reduction            | 43.36%                      | 69.27%                     | 64.08%                    | 78.57<br>%                          | 51.46<br>%                           | 72.93%                        | 78.43%                                            | 100.00%                      |
| CS <sub>70/5</sub> NPs  | U 4/0/0.75                  | U 4/1/0.5                  | U 4/2/0.25                | L 4/0/0.75                          | L 4/1/0.5                            | L 4/2/0.25                    | U: unloaded<br>L: loaded<br>NPs:<br>nanoparticles |                              |
| OD reduction            | 21.80%                      | 22.72%                     | 21.14%                    | 25.18<br>%                          | 30.33<br>%                           | 34.71%                        |                                                   |                              |
| QS reduction            | 30.90%                      | 38.45%                     | 38.07%                    | 38.18<br>%                          | 52.32<br>%                           | 61.12%                        |                                                   |                              |

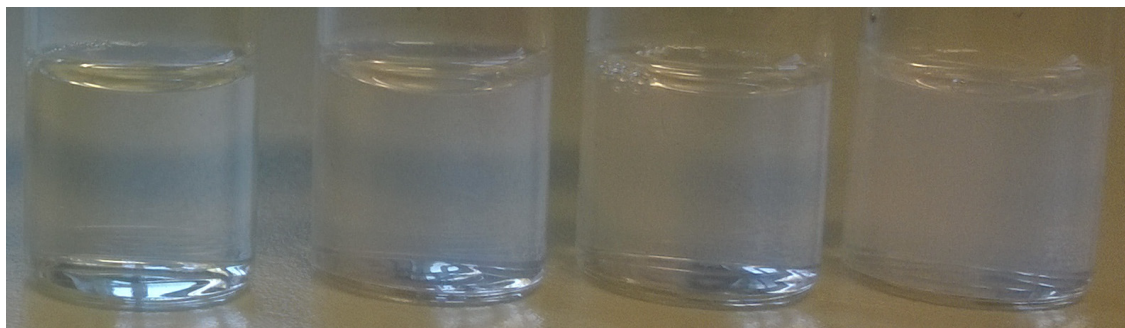

27

**4/0/0.5**

**4/0/0.75**

**4/1/0.5**

**4/2/0.25**

28

**Figure S1.** Unloaded CS<sub>70/5</sub> nanoparticles

29

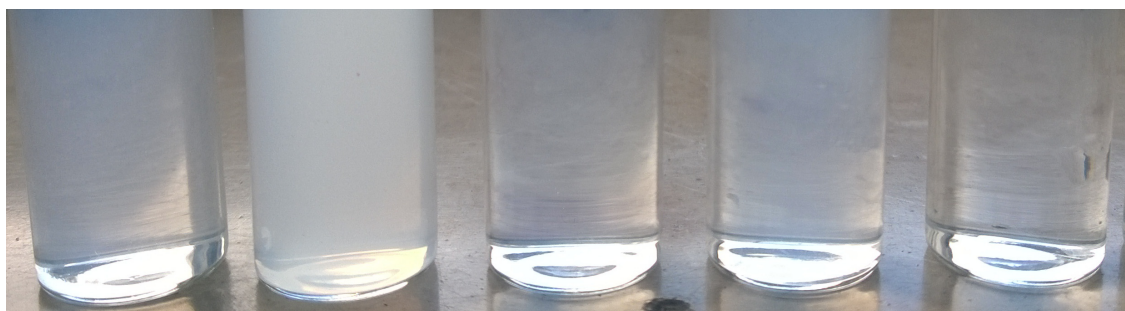

30

**4/3/0**

**4/4/0**

**4/0/1**

**4/2/0.5**

**4/1/0.75**

31

**Figure S2.** Unloaded CS<sub>70/20</sub> nanoparticles

32
